# Supplementary material
Source: PubMed Central journal article supplement (PMC4115295)
Supplement: NIHMS597911-supplement-Supplemental_Material.pdf [file NIHMS597911-supplement-Supplemental_Material.pdf]

# **SUPPLEMENTAL MATERIAL**

**Supplementary  
Figure 1.**

**A**

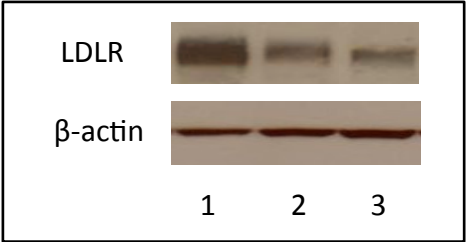

**B**

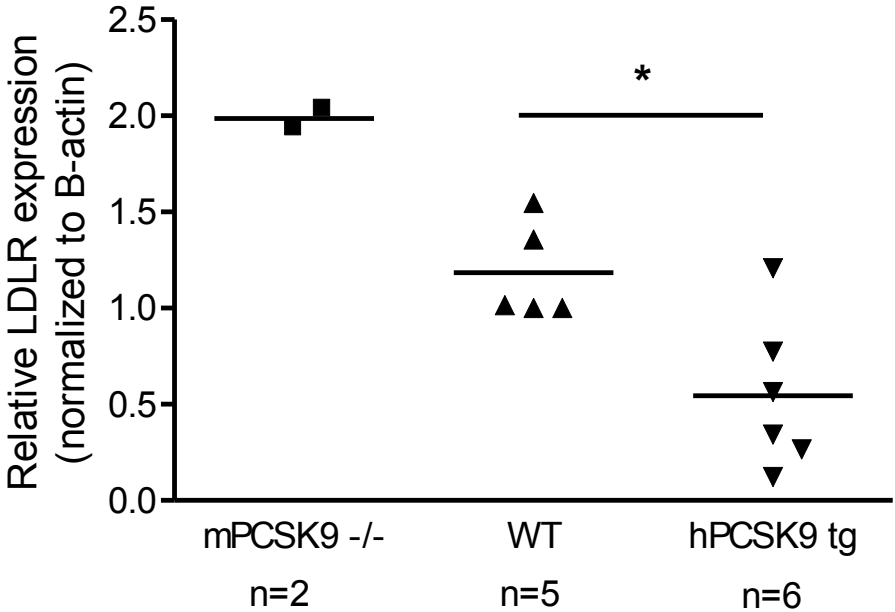

# Supplementary Figure 2.

**A**

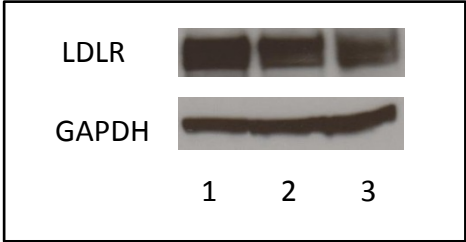

**B**

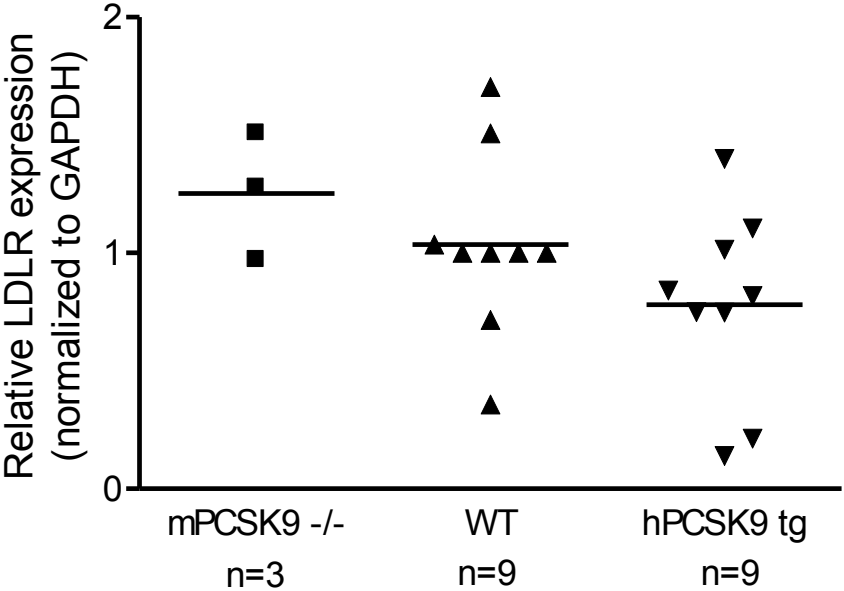

**Supplementary  
Table 1.**

|                                       | <b>Mean</b> | <b>SEM</b> |
|---------------------------------------|-------------|------------|
| <b><i>SREBP1</i> and Target Genes</b> |             |            |
| <b><i>SREBP1</i></b>                  | 0.94        | 0.15       |
| <b><i>DGAT1</i></b>                   | 0.93        | 0.16       |
|                                       |             |            |
| <b><i>SREBP2</i> and Target Genes</b> |             |            |
| <b><i>SREBP2</i></b>                  | 1.10        | 0.16       |
| <b><i>HMG CoA Reductase</i></b>       | 1.00        | 0.15       |
| <b><i>HMG CoA Synthase</i></b>        | 1.10        | 0.23       |
| <b><i>SS</i></b>                      | 1.20        | 0.26       |
| <b><i>LDLR</i></b>                    | 1.04        | 0.10       |
| <b><i>PCSK9</i></b>                   | 1.06        | 0.18       |

**Supplementary  
Table 2.**

|                                       | <b>Mean</b> | <b>SEM</b> |
|---------------------------------------|-------------|------------|
| <b><i>SREBP1</i> and Target Genes</b> |             |            |
| <b><i>SREBP1</i></b>                  | 1.07        | 0.18       |
| <b><i>FAS</i></b>                     | 1.20        | 0.24       |
| <b><i>SCD</i></b>                     | 0.98        | 0.13       |
| <b><i>DGAT1</i></b>                   | 1.03        | 0.19       |
|                                       |             |            |
| <b><i>SREBP2</i> and Target Genes</b> |             |            |
| <b><i>SREBP2</i></b>                  | 1.13        | 0.10       |
| <b><i>LDLR</i></b>                    | 1.08        | 0.15       |
| <b><i>PCSK9</i></b>                   | 0.99        | 0.25       |

## Supplementary Legends.

**Supplementary Figure 1. LDLR Levels in the Small Intestine of mPCSK9<sup>-/-</sup>, WT and hPCSK9 tg Mice.** (A) Immunoblot showing LDLR and  $\beta$ -actin in the small intestine. Lane 1: mPCSK9<sup>-/-</sup>; lane 2: WT; lane 3: hPCSK9 tg. (B) Quantitative analysis of LDLR protein levels normalized to  $\beta$ -actin in the small intestine. (One-Way ANOVA: \*p<0.05, \*\*\* p<0.001).

**Supplementary Figure 2. LDLR Levels in the Large Intestine of mPCSK9<sup>-/-</sup>, WT and hPCSK9 tg Mice.** (A) Immunoblot showing LDLR and GAPDH in the large intestine. Lane 1: mPCSK9<sup>-/-</sup>; lane 2: WT; lane 3: hPCSK9 tg. (B) Quantitative analysis of LDLR protein levels normalized to GAPDH in the large intestine.

**Supplemental Table 1.** Fold Change in Gene Expression Levels in PCSK9 Treated CaCo-2 Cells (10  $\mu$ g/mL, 24 Hours) from Control Untreated Levels. All Data in the Current Table Show Data with Expression Levels which are Not Significantly Different from Control Levels.

**Supplemental Table 2.** Fold Change in Gene Expression Levels in siPCSK9 Transfected CaCo-2 Cells (48 Hours) Versus Cells Transfected with a Negative Control Vector. All Data in the Current Table Show Data with Expression Levels which are Not Significantly Different from Control Levels
